# Supplementary material for: Analysis of Five-Extraction Technologies’ Environmental Impact on the Polyphenols Production from Moringa oleifera Leaves Using the Life Cycle Assessment Tool Based on ISO 14040
Source: MDPI journal article supplement (doi:10.3390/su15032328), 2023-01-27
Supplement: s1 [file s1]

# Analysis of five-extraction technologies' environmental impact on the polyphenols production from *Moringa oleifera* leaves using the Life Cycle Assessment tool based on ISO 14040

Vasileios M. Pappas <sup>1</sup>, Iordanis Samanidis <sup>2</sup>, Giorgos Stavropoulos <sup>2</sup>, Vassilis Athanasiadis <sup>1</sup>,  
Theodoros Chatzimitakos <sup>1</sup>, Eleni Bozinou <sup>1</sup>, Dimitris P. Makris <sup>1</sup> and Stavros I. Lalas <sup>1,\*</sup>

<sup>1</sup> Department of Food Science & Nutrition, University of Thessaly, Terma N. Temponera Str.,  
GR-43100 Karditsa, Greece

<sup>2</sup> Korres S.A.—Natural Products, 57th kilm Athens-Lamia r., GR-32011 Inofyta-Viotia, Greece

\* Correspondence: slalas@uth.gr; Tel.: +30-24410-64783 / Fax: +30-24410-64781

## Supplementary Material

**Table S1.** LCI of 1 g *Moringa oleifera* leaves production (8% moisture).

| Outputs to technosphere: Products and co-products                                                                                        | Amount                 | Unit | Comments                           |
|------------------------------------------------------------------------------------------------------------------------------------------|------------------------|------|------------------------------------|
| <i>Moringa oleifera</i> leaves 8% moisture (DMPM)                                                                                        | 1.00                   | g    | 100% allocation, no waste scenario |
| <b>INPUTS</b>                                                                                                                            |                        |      |                                    |
| <b>Inputs from nature</b>                                                                                                                |                        |      |                                    |
| Water, unspecified natural origin, GR                                                                                                    | 32.90                  | mL   |                                    |
| <b>Inputs from technosphere: materials/fuels</b>                                                                                         |                        |      |                                    |
| Tap water {RoW}/ market for/ cut-off, S                                                                                                  | 1.00                   | g    |                                    |
| Diesel {GLO} / market group for / cut-off, S                                                                                             | $8.78 \times 10^{-4}$  | Kg   |                                    |
| Polyvinylchloride, bulk polymerized {GLO} / market for / cut-off, S                                                                      | $9.00 \times 10^{-5}$  | Kg   |                                    |
| Polypropylene, granulate {GLO} / market for / cut-off, S                                                                                 | $8.00 \times 10^{-5}$  | Kg   |                                    |
| Transport, freight, lorry 3.5–7.5 metric ton, euro 5 {RER} / market for transport, freight, lorry 3.5–7.5 metric ton, EURO5 / cut-off, S | $8.00 \times 10^{-4}$  | tkm  |                                    |
| Transport, freight, lorry 3.5–7.5 metric ton, euro 5 {RER} / market for transport, freight, lorry 3.5–7.5 metric ton, EURO5 / cut-off, S | $1.00 \times 10^{-3}$  | tkm  |                                    |
| <b>Inputs from technosphere: electricity/heat</b>                                                                                        |                        |      |                                    |
| Electricity, low voltage {GR} / market for / cut-off, S                                                                                  | $0.025 \times 10^{-2}$ | KWh  |                                    |
| Electricity, low voltage {GR} / market for / cut-off, S                                                                                  | 0.012                  | KWh  |                                    |
| <b>OUTPUTS</b>                                                                                                                           |                        |      |                                    |
| <b>Emissions to air</b>                                                                                                                  |                        |      |                                    |
| NO <sub>2</sub>                                                                                                                          | $5.82 \times 10^{-4}$  | Kg   |                                    |
| CO <sub>2</sub>                                                                                                                          | $1.04 \times 10^{-4}$  | Kg   |                                    |
| H <sub>2</sub> O                                                                                                                         | $9.55 \times 10^{-5}$  | Kg   |                                    |
| O <sub>2</sub>                                                                                                                           | $7.81 \times 10^{-5}$  | Kg   |                                    |
| CO                                                                                                                                       | $8.68 \times 10^{-7}$  | Kg   |                                    |
| CH <sub>4</sub>                                                                                                                          | $4.34 \times 10^{-7}$  | Kg   |                                    |
| NO <sub>x</sub>                                                                                                                          | $4.34 \times 10^{-6}$  | Kg   |                                    |
| Particulates, diesel soot                                                                                                                | $2.60 \times 10^{-6}$  | Kg   |                                    |
| SO <sub>2</sub>                                                                                                                          | $4.34 \times 10^{-7}$  | Kg   |                                    |

**Table S2.** LCI for the PEF (S1) extractor used.

| Outputs to technosphere: Products and co-products                         | Amount | Unit | Comments |
|---------------------------------------------------------------------------|--------|------|----------|
| PEF (S1)                                                                  | 1      | P    |          |
| <b>INPUTS</b>                                                             |        |      |          |
| <b>Inputs from technosphere: materials/fuels</b>                          |        |      |          |
| Chromium steel pipe {GLO} / market for / cut-off, S                       | 6.05   | Kg   |          |
| COPPER {GLO} / market for / cut-off, S                                    | 0.90   | Kg   |          |
| Glass tube, borosilicate {GLO} / market for / cut-off, S                  | 0.20   | Kg   |          |
| Acrylonitrile-butadiene-styrene copolymer {GLO} / market for / cut-off, S | 0.60   | Kg   |          |
| Tetrafluoroethylene {GLO} / market for / cut-off, S                       | 0.10   | Kg   |          |
| Polyvinylchloride, bulk polymerized {GLO} / market for / cut-off, S       | 0.40   | Kg   |          |

**Table S3.** LCI for the Microwave (S2) extractor used.

| Outputs to technosphere: Products and co-products                         | Amount | Unit | Comments |
|---------------------------------------------------------------------------|--------|------|----------|
| Microwave (S2)                                                            | 1      | P    |          |
| <b>INPUTS</b>                                                             |        |      |          |
| <b>Inputs from technosphere: materials/fuels</b>                          |        |      |          |
| Chromium steel pipe {GLO} / market for / cut-off, S                       | 8.00   | Kg   |          |
| COPPER {GLO} / market for / cut-off, S                                    | 1.00   | Kg   |          |
| Glass tube, borosilicate {GLO} / market for / cut-off, S                  | 0.05   | Kg   |          |
| Acrylonitrile-butadiene-styrene copolymer {GLO} / market for / cut-off, S | 1.00   | Kg   |          |

**Table S4.** LCI for the Ultrasound (S3) extractor used.

| Outputs to technosphere: Products and co-products                   | Amount                | Unit | Comments |
|---------------------------------------------------------------------|-----------------------|------|----------|
| Ultrasound (S3)                                                     | 1                     | P    |          |
| <b>INPUTS</b>                                                       |                       |      |          |
| <b>Inputs from technosphere: materials/fuels</b>                    |                       |      |          |
| Chromium steel pipe {GLO} / market for / cut-off, S                 | 4.40                  | Kg   |          |
| COPPER {GLO} / market for / cut-off, S                              | 0.20                  | Kg   |          |
| Glass tube, borosilicate {GLO} / market for / cut-off, S            | 0.05                  | Kg   |          |
| Polyvinylchloride, bulk polymerized {GLO} / market for / cut-off, S | $3.04 \times 10^{-1}$ | Kg   |          |

**Table S5.** LCI for the Boiling Water (S4) extractor used.

| Outputs to technosphere: Products and co-products                   | Amount                | Unit | Comments |
|---------------------------------------------------------------------|-----------------------|------|----------|
| Boiling water (S4)                                                  | 1                     | P    |          |
| <b>INPUTS</b>                                                       |                       |      |          |
| <b>Inputs from technosphere: materials/fuels</b>                    |                       |      |          |
| Chromium steel pipe {GLO} / market for / cut-off, S                 | 1.95                  | Kg   |          |
| COPPER {GLO} / market for / cut-off, S                              | 0.15                  | Kg   |          |
| Glass tube, borosilicate {GLO} / market for / cut-off, S            | 0.05                  | Kg   |          |
| Polyvinylchloride, bulk polymerized {GLO} / market for / cut-off, S | $2.21 \times 10^{-1}$ | Kg   |          |

**Table S6.** LCI for the Control (S5) extractor used.

| Outputs to technosphere: Products and co-products        | Amount | Unit | Comments |
|----------------------------------------------------------|--------|------|----------|
| Control (S5)                                             | 1      | P    |          |
| <b>INPUTS</b>                                            |        |      |          |
| <b>Inputs from technosphere: materials/fuels</b>         |        |      |          |
| Glass tube, borosilicate {GLO} / market for / cut-off, S | 0.05   | Kg   |          |

**Table S7.** LCI for the production of 1 g of polyphenols using PEF (S1).

| Outputs to technosphere: Products and co-products            | Amount                | Unit | Comments                           |
|--------------------------------------------------------------|-----------------------|------|------------------------------------|
| PEF (S1) polyphenols                                         | 1.00                  | g    | 100% allocation, no waste scenario |
| <b>INPUTS</b>                                                |                       |      |                                    |
| <b>Inputs from technosphere: materials/fuels/electricity</b> |                       |      |                                    |
| PEF (S1) extractor                                           | $3.54 \times 10^{-4}$ | P    |                                    |
| Tap water {Europe without Swiss} / market for / cut-off, S   | 749.00                | g    |                                    |
| Electricity, low voltage {GR} / market for / cut-off, S      | 0.395                 | KWh  |                                    |
| <i>Moringa oleifera</i> leaves 8% moisture (DMPM)            | 27.00                 | g    |                                    |
| <b>OUTPUTS</b>                                               |                       |      |                                    |
| <b>Emissions to air</b>                                      |                       |      |                                    |
| Heat, waste                                                  | 0                     | KJ   |                                    |
| <b>Final waste flows</b>                                     |                       |      |                                    |
| Compost                                                      | 236.50                | g    |                                    |

**Table S8.** LCI for the production of 1 g of polyphenols using Microwave (S2).

| Outputs to technosphere: Products and co-products            | Amount                | Unit | Comments                           |
|--------------------------------------------------------------|-----------------------|------|------------------------------------|
| Microwave (S2) polyphenols                                   | 1.00                  | g    | 100% allocation, no waste scenario |
| <b>INPUTS</b>                                                |                       |      |                                    |
| <b>Inputs from technosphere: materials/fuels/electricity</b> |                       |      |                                    |
| Microwave (S2) extractor                                     | $7.79 \times 10^{-5}$ | P    |                                    |
| Tap water {Europe without Swiss} / market for / cut-off, S   | 914.00                | g    |                                    |
| Electricity, low voltage {GR} / market for / cut-off, S      | 0.278                 | KWh  |                                    |
| <i>Moringa oleifera</i> leaves 8% moisture (DMPM)            | 29.70                 | g    |                                    |
| <b>OUTPUTS</b>                                               |                       |      |                                    |
| <b>Emissions to air</b>                                      |                       |      |                                    |
| Heat, waste                                                  | 136.532               | KJ   |                                    |
| <b>Final waste flows</b>                                     |                       |      |                                    |
| Compost                                                      | 350.36                | g    |                                    |

**Table S9.** LCI for the production of 1 g of polyphenols using Ultrasound (S3).

| Outputs to technosphere: Products and co-products            | Amount                | Unit | Comments                           |
|--------------------------------------------------------------|-----------------------|------|------------------------------------|
| Ultrasound (S3) polyphenols                                  | 1.00                  | g    | 100% allocation, no waste scenario |
| <b>INPUTS</b>                                                |                       |      |                                    |
| <b>Inputs from technosphere: materials/fuels/electricity</b> |                       |      |                                    |
| Ultrasound (S3) extractor                                    | $0.46 \times 10^{-3}$ | P    |                                    |
| Tap water {Europe without Swiss} / market for / cut-off, S   | $1.06 \times 10^3$    | g    |                                    |
| Electricity, low voltage {GR} / market for / cut-off, S      | 3.740                 | KWh  |                                    |
| <i>Moringa oleifera</i> leaves 8% moisture (DMPM)            | 37.40                 | g    |                                    |
| <b>OUTPUTS</b>                                               |                       |      |                                    |
| <b>Emissions to air</b>                                      |                       |      |                                    |
| Heat, waste                                                  | 34.431                | KJ   |                                    |
| <b>Final waste flows</b>                                     |                       |      |                                    |
| Compost                                                      | 351.80                | g    |                                    |

**Table S10.** LCI for the production of 1 g of polyphenols using Boiling water (S4).

| Outputs to technosphere: Products and co-products            | Amount                | Unit | Comments                           |
|--------------------------------------------------------------|-----------------------|------|------------------------------------|
| Boiling water (S4) polyphenols                               | 1.00                  | g    | 100% allocation, no waste scenario |
| <b>INPUTS</b>                                                |                       |      |                                    |
| <b>Inputs from technosphere: materials/fuels/electricity</b> |                       |      |                                    |
| Boiling water (S4) extractor                                 | $9.04 \times 10^{-5}$ | P    |                                    |
| Tap water {Europe without Swiss} / market for / cut-off, S   | $1.11 \times 10^3$    | g    |                                    |
| Electricity, low voltage {GR} / market for / cut-off, S      | 2.070                 | KWh  |                                    |
| <i>Moringa oleifera</i> leaves 8% moisture (DMPM)            | 34.40                 | g    |                                    |
| <b>OUTPUTS</b>                                               |                       |      |                                    |
| <b>Emissions to air</b>                                      |                       |      |                                    |
| Heat, waste                                                  | 181.377               | KJ   |                                    |
| <b>Final waste flows</b>                                     |                       |      |                                    |
| Compost                                                      | 458.68                | g    |                                    |

**Table S11.** LCI for the production of 1 g of polyphenols using Maceration - Control (S5).

| Outputs to technosphere: Products and co-products            | Amount                | Unit | Comments                           |
|--------------------------------------------------------------|-----------------------|------|------------------------------------|
| Boiling water (S4) polyphenols                               | 1.00                  | g    | 100% allocation, no waste scenario |
| <b>INPUTS</b>                                                |                       |      |                                    |
| <b>Inputs from technosphere: materials/fuels/electricity</b> |                       |      |                                    |
| Control (S5) extractor                                       | $1.03 \times 10^{-3}$ | P    |                                    |
| Tap water {Europe without Swiss} / market for / cut-off, S   | $1.08 \times 10^3$    | g    |                                    |
| <i>Moringa oleifera</i> leaves 8% moisture (DMPM)            | 39.20                 | g    |                                    |
| <b>OUTPUTS</b>                                               |                       |      |                                    |
| <b>Emissions to air</b>                                      |                       |      |                                    |
| Heat, waste                                                  | 0                     | KJ   |                                    |
| <b>Final waste flows</b>                                     |                       |      |                                    |
| Compost                                                      | 340.12                | g    |                                    |

**Table S12.** Process contribution for the system S5 (C) without sensitivity analysis.

| <b>Product: 1 Kg control (S5) polyphenols (of project PEF)</b>   |                                                                                                                                         |                                                              |      |           |                          |                            |                                                                  |                                   |
|------------------------------------------------------------------|-----------------------------------------------------------------------------------------------------------------------------------------|--------------------------------------------------------------|------|-----------|--------------------------|----------------------------|------------------------------------------------------------------|-----------------------------------|
| <b>Method:</b> ReCiPe 2016 Endpoint (H) V1.03 / World (2010) H/A |                                                                                                                                         |                                                              |      |           |                          |                            |                                                                  |                                   |
| <b>Indicator:</b> Single score                                   |                                                                                                                                         |                                                              |      |           |                          |                            |                                                                  |                                   |
| <b>Cut-off:</b> 0%                                               |                                                                                                                                         |                                                              |      |           |                          |                            |                                                                  |                                   |
| <b>Default units:</b> No                                         |                                                                                                                                         |                                                              |      |           |                          |                            |                                                                  |                                   |
| <b>Exclude infrastructure processes:</b> No                      |                                                                                                                                         |                                                              |      |           |                          |                            |                                                                  |                                   |
| <b>Exclude long-term emissions:</b> No                           |                                                                                                                                         |                                                              |      |           |                          |                            |                                                                  |                                   |
| <b>Sorted on item:</b> Total                                     |                                                                                                                                         |                                                              |      |           |                          |                            |                                                                  |                                   |
| <b>Sort order:</b> Descending                                    |                                                                                                                                         |                                                              |      |           |                          |                            |                                                                  |                                   |
| No                                                               | Process                                                                                                                                 | Project                                                      | Unit | Total     | Control (S5) polyphenols | Control (S5) extractor new | Tap water {Europe without Switzerland}   market for   Cut-off, S | Moringa leaves 8% moisture (DMPM) |
|                                                                  | Total of all processes                                                                                                                  |                                                              | Pt   | 57.255323 | 0                        | 0.0061672                  | 0.0724177                                                        | 57.176738                         |
| 1                                                                | Moringa leaves 8% moisture (DMPM)                                                                                                       | PEF                                                          | Pt   | 27.883349 | 0                        | 0                          | 0                                                                | 27.883349                         |
| 2                                                                | Electricity, low voltage {GR}   market for   Cut-off, S                                                                                 | Ecoinvent 3 - allocation, cut-off by classification - system | Pt   | 26.461639 | 0                        | 0                          | 0                                                                | 26.461639                         |
| 3                                                                | Transport, freight, lorry 3.5-7.5 metric ton, euro5 {RER}   market for transport, freight, lorry 3.5-7.5 metric ton, EURO5   Cut-off, S | Ecoinvent 3 - allocation, cut-off by classification - system | Pt   | 1.2639092 | 0                        | 0                          | 0                                                                | 1.2639092                         |
| 4                                                                | Diesel {GLO}   market group for   Cut-off, S                                                                                            | Ecoinvent 3 - allocation, cut-off by classification - system | Pt   | 1.0952844 | 0                        | 0                          | 0                                                                | 1.0952844                         |
| 5                                                                | Polyvinylchloride, bulk polymerised {GLO}   market for   Cut-off, S                                                                     | Ecoinvent 3 - allocation, cut-off by classification - system | Pt   | 0.2640175 | 0                        | 0                          | 0                                                                | 0.2640175                         |
| 6                                                                | Polypropylene, granulate {GLO}   market for   Cut-off, S                                                                                | Ecoinvent 3 - allocation, cut-off by classification - system | Pt   | 0.2052454 | 0                        | 0                          | 0                                                                | 0.2052454                         |
| 7                                                                | Tap water {Europe without Switzerland}   market for   Cut-off, S                                                                        | Ecoinvent 3 - allocation, cut-off by classification - system | Pt   | 0.0724177 | 0                        | 0                          | 0.0724177                                                        | 0                                 |
| 8                                                                | Glass tube, borosilicate {GLO}   market for   Cut-off, S                                                                                | Ecoinvent 3 - allocation, cut-off by classification - system | Pt   | 0.0061672 | 0                        | 0.0061672                  | 0                                                                | 0                                 |
| 9                                                                | Tap water {RoW}   market for   Cut-off, S                                                                                               | Ecoinvent 3 - allocation, cut-off by classification - system | Pt   | 0.0032941 | 0                        | 0                          | 0                                                                | 0.0032941                         |
| 10                                                               | Control (S5) polyphenols                                                                                                                | PEF                                                          | Pt   | 0         | 0                        | 0                          | 0                                                                | 0                                 |
| 11                                                               | Control (S5) extractor new                                                                                                              | PEF                                                          | Pt   | 0         | 0                        | 0                          | 0                                                                | 0                                 |

**Table S13.** Process contribution for the system S5 (C) with sensitivity analysis.

| <b>Product:</b> 1 Kg control (S5) polyphenols (of project PEF with sensitivity analysis - electricity) |                                                                                                                                             |                                                              |      |           |                          |                            |                                                                  |                                   |
|--------------------------------------------------------------------------------------------------------|---------------------------------------------------------------------------------------------------------------------------------------------|--------------------------------------------------------------|------|-----------|--------------------------|----------------------------|------------------------------------------------------------------|-----------------------------------|
| <b>Method:</b> ReCiPe 2016 Endpoint (H) V1.03 / World (2010) H/A                                       |                                                                                                                                             |                                                              |      |           |                          |                            |                                                                  |                                   |
| <b>Indicator:</b> Single score                                                                         |                                                                                                                                             |                                                              |      |           |                          |                            |                                                                  |                                   |
| <b>Cut-off:</b> 0%                                                                                     |                                                                                                                                             |                                                              |      |           |                          |                            |                                                                  |                                   |
| <b>Default units:</b> No                                                                               |                                                                                                                                             |                                                              |      |           |                          |                            |                                                                  |                                   |
| <b>Exclude infrastructure processes:</b> No                                                            |                                                                                                                                             |                                                              |      |           |                          |                            |                                                                  |                                   |
| <b>Exclude long-term emissions:</b> No                                                                 |                                                                                                                                             |                                                              |      |           |                          |                            |                                                                  |                                   |
| <b>Sorted on item:</b> Total                                                                           |                                                                                                                                             |                                                              |      |           |                          |                            |                                                                  |                                   |
| <b>Sort order:</b> Descending                                                                          |                                                                                                                                             |                                                              |      |           |                          |                            |                                                                  |                                   |
| No                                                                                                     | Process                                                                                                                                     | Project                                                      | Unit | Total     | Control (S5) polyphenols | Control (S5) extractor new | Tap water {Europe without Switzerland}   market for   Cut-off, S | Moringa leaves 8% moisture (DMPM) |
|                                                                                                        | Total of all processes                                                                                                                      |                                                              | Pt   | 32.986533 | 0                        | 0.0061672                  | 0.0724177                                                        | 32.907948                         |
| 1                                                                                                      | Moringa leaves 8% moisture (DMPM)                                                                                                           | PEF with sensitivity analysis (electricity)                  | Pt   | 27.883349 | 0                        | 0                          | 0                                                                | 27.883349                         |
| 2                                                                                                      | Electricity, low voltage {GR}   electricity production, photovoltaic, 3kWp slanted-roof installation, multi-Si, panel, mounted   Cut-off, S | Ecoinvent 3 - allocation, cut-off by classification - system | Pt   | 2.1928484 | 0                        | 0                          | 0                                                                | 2.1928484                         |
| 3                                                                                                      | Transport, freight, lorry 3.5–7.5 metric ton, euro5 {RER}   market for transport, freight, lorry 3.5–7.5 metric ton, EURO5   Cut-off, S     | Ecoinvent 3 - allocation, cut-off by classification - system | Pt   | 1.2639092 | 0                        | 0                          | 0                                                                | 1.2639092                         |
| 4                                                                                                      | Diesel {GLO}   market group for   Cut-off, S                                                                                                | Ecoinvent 3 - allocation, cut-off by classification - system | Pt   | 1.0952844 | 0                        | 0                          | 0                                                                | 1.0952844                         |
| 5                                                                                                      | Polyvinylchloride, bulk polymerised {GLO}   market for   Cut-off, S                                                                         | Ecoinvent 3 - allocation, cut-off by classification - system | Pt   | 0.2640175 | 0                        | 0                          | 0                                                                | 0.2640175                         |
| 6                                                                                                      | Polypropylene, granulate {GLO}   market for   Cut-off, S                                                                                    | Ecoinvent 3 - allocation, cut-off by classification - system | Pt   | 0.2052454 | 0                        | 0                          | 0                                                                | 0.2052454                         |
| 7                                                                                                      | Tap water {Europe without Switzerland}   market for   Cut-off, S                                                                            | Ecoinvent 3 - allocation, cut-off by classification - system | Pt   | 0.0724177 | 0                        | 0                          | 0.0724177                                                        | 0                                 |
| 8                                                                                                      | Glass tube, borosilicate {GLO}   market for   Cut-off, S                                                                                    | Ecoinvent 3 - allocation, cut-off by classification - system | Pt   | 0.0061672 | 0                        | 0.0061672                  | 0                                                                | 0                                 |
| 9                                                                                                      | Tap water {RoW}   market for   Cut-off, S                                                                                                   | Ecoinvent 3 - allocation, cut-off by classification - system | Pt   | 0.0032941 | 0                        | 0                          | 0                                                                | 0.0032941                         |
| 10                                                                                                     | Control (S5) polyphenols                                                                                                                    | PEF with sensitivity analysis (electricity)                  | Pt   | 0         | 0                        | 0                          | 0                                                                | 0                                 |
| 11                                                                                                     | Control (S5) extractor new                                                                                                                  | PEF with sensitivity analysis (electricity)                  | Pt   | 0         | 0                        | 0                          | 0                                                                | 0                                 |



**Table S14.** Process contribution for the system S1 (PEF) with sensitivity analysis.

| Calculation: Analysis of System 1 (PEF - Process contribution with sensitivity analysis)     |                                                                                                                                              |                                                              |      |             |                       |                         |                                                                  |                                                                                                                                             |                                   |
|----------------------------------------------------------------------------------------------|----------------------------------------------------------------------------------------------------------------------------------------------|--------------------------------------------------------------|------|-------------|-----------------------|-------------------------|------------------------------------------------------------------|---------------------------------------------------------------------------------------------------------------------------------------------|-----------------------------------|
| Results: Process contribution                                                                |                                                                                                                                              |                                                              |      |             |                       |                         |                                                                  |                                                                                                                                             |                                   |
| Product: 1 Kg PEF5 (S1) polyphenols (of project PEF with sensitivity analysis - electricity) |                                                                                                                                              |                                                              |      |             |                       |                         |                                                                  |                                                                                                                                             |                                   |
| Method: ReCiPe 2016 Endpoint (H) V1.03 / World (2010) H/A                                    |                                                                                                                                              |                                                              |      |             |                       |                         |                                                                  |                                                                                                                                             |                                   |
| Indicator: Single score                                                                      |                                                                                                                                              |                                                              |      |             |                       |                         |                                                                  |                                                                                                                                             |                                   |
| Cut-off: 0%                                                                                  |                                                                                                                                              |                                                              |      |             |                       |                         |                                                                  |                                                                                                                                             |                                   |
| Default units: No                                                                            |                                                                                                                                              |                                                              |      |             |                       |                         |                                                                  |                                                                                                                                             |                                   |
| Exclude infrastructure processes: No                                                         |                                                                                                                                              |                                                              |      |             |                       |                         |                                                                  |                                                                                                                                             |                                   |
| Exclude long-term emissions: No                                                              |                                                                                                                                              |                                                              |      |             |                       |                         |                                                                  |                                                                                                                                             |                                   |
| Sorted on item: Total                                                                        |                                                                                                                                              |                                                              |      |             |                       |                         |                                                                  |                                                                                                                                             |                                   |
| Sort order: Descending                                                                       |                                                                                                                                              |                                                              |      |             |                       |                         |                                                                  |                                                                                                                                             |                                   |
| No                                                                                           | Process                                                                                                                                      | Project                                                      | Unit | Total       | PEF5 (S1) polyphenols | PEF5 (S1) extractor new | Tap water {Europe without Switzerland}   market for   Cut-off, S | Electricity, low voltage {GR}   electricity production, photovoltaic, 3kWp slanted-roof installation, multi-Si, panel, mounted   Cut-off, S | Moringa leaves 8% moisture (DMPM) |
| 1                                                                                            | Total of all processes                                                                                                                       |                                                              | Pt   | 26.718349   | 0                     | 2.1895459               | 0.0500391                                                        | 1.8056109                                                                                                                                   | 22.673153                         |
|                                                                                              | Moringa leaves 8% moisture (DMPM)                                                                                                            | PEF with sensitivity analysis (electricity)                  | Pt   | 19.211269   | 0                     | 0                       | 0                                                                | 0                                                                                                                                           | 19.211269                         |
| 2                                                                                            | Electricity, low voltage {GR}   electricity production, photovoltaic, 3 kWp slanted-roof installation, multi-Si, panel, mounted   Cut-off, S | Ecoinvent 3 - allocation, cut-off by classification - system | Pt   | 3.3164553   | 0                     | 0                       | 0                                                                | 1.8056109                                                                                                                                   | 1.5108444                         |
| 3                                                                                            | Copper {GLO}   market for   Cut-off, S                                                                                                       | Ecoinvent 3 - allocation, cut-off by classification - system | Pt   | 1.1403451   | 0                     | 1.1403451               | 0                                                                | 0                                                                                                                                           | 0                                 |
| 4                                                                                            | Chromium steel pipe {GLO}   market for   Cut-off, S                                                                                          | Ecoinvent 3 - allocation, cut-off by classification - system | Pt   | 0.90093169  | 0                     | 0.9009317               | 0                                                                | 0                                                                                                                                           | 0                                 |
| 5                                                                                            | Transport, freight, lorry 3.5–7.5 metric ton, euro5 {RER}   market for transport, freight, lorry 3.5–7.5 metric ton, EURO5   Cut-off, S      | Ecoinvent 3 - allocation, cut-off by classification - system | Pt   | 0.87081722  | 0                     | 0                       | 0                                                                | 0                                                                                                                                           | 0.87081722                        |
| 6                                                                                            | Diesel {GLO}   market group for   Cut-off, S                                                                                                 | Ecoinvent 3 - allocation, cut-off by classification - system | Pt   | 0.75463687  | 0                     | 0                       | 0                                                                | 0                                                                                                                                           | 0.75463687                        |
| 7                                                                                            | Polyvinylchloride, bulk polymerised {GLO}   market for   Cut-off, S                                                                          | Ecoinvent 3 - allocation, cut-off by classification - system | Pt   | 0.19251444  | 0                     | 0.0106098               | 0                                                                | 0                                                                                                                                           | 0.18190466                        |
| 8                                                                                            | Polypropylene, granulate {GLO}   market for   Cut-off, S                                                                                     | Ecoinvent 3 - allocation, cut-off by classification - system | Pt   | 0.14141145  | 0                     | 0                       | 0                                                                | 0                                                                                                                                           | 0.14141145                        |
| 9                                                                                            | Tetrafluoroethylene {GLO}   market for   Cut-off, S                                                                                          | Ecoinvent 3 - allocation, cut-off by classification - system | Pt   | 0.097681626 | 0                     | 0.0976816               | 0                                                                | 0                                                                                                                                           | 0                                 |
| 10                                                                                           | Tap water {Europe without Switzerland}   market for   Cut-off, S                                                                             | Ecoinvent 3 - allocation, cut-off by classification - system | Pt   | 0.05003908  | 0                     | 0                       | 0.0500391                                                        | 0                                                                                                                                           | 0                                 |
| 11                                                                                           | Acrylonitrile-butadiene-styrene copolymer {GLO}   market for   Cut-off, S                                                                    | Ecoinvent 3 - allocation, cut-off by classification - system | Pt   | 0.031479473 | 0                     | 0.0314795               | 0                                                                | 0                                                                                                                                           | 0                                 |
| 12                                                                                           | Glass tube, borosilicate {GLO}   market for   Cut-off, S                                                                                     | Ecoinvent 3 - allocation, cut-off by classification - system | Pt   | 0.008498254 | 0                     | 0.0084983               | 0                                                                | 0                                                                                                                                           | 0                                 |
| 13                                                                                           | Tap water {RoW}   market for   Cut-off, S                                                                                                    | Ecoinvent 3 - allocation, cut-off by classification - system | Pt   | 0.002269603 | 0                     | 0                       | 0                                                                | 0                                                                                                                                           | 0.002269603                       |
| 14                                                                                           | PEF5 (S1) polyphenols                                                                                                                        | PEF with sensitivity analysis (electricity)                  | Pt   | 0           | 0                     | 0                       | 0                                                                | 0                                                                                                                                           | 0                                 |
| 15                                                                                           | PEF5 (S1) extractor new                                                                                                                      | PEF with sensitivity analysis (electricity)                  | Pt   | 0           | 0                     | 0                       | 0                                                                | 0                                                                                                                                           | 0                                 |

**Table S15.** Process contribution for the system S2 (MAE) with sensitivity analysis.

| Calculation: Analysis of System 2 (Microwave - Process contribution with sensitivity analysis)    |                                                                                                                                             |                                                              |      |           |                            |                              |                                                                                                                                             |                                                                  |                                   |
|---------------------------------------------------------------------------------------------------|---------------------------------------------------------------------------------------------------------------------------------------------|--------------------------------------------------------------|------|-----------|----------------------------|------------------------------|---------------------------------------------------------------------------------------------------------------------------------------------|------------------------------------------------------------------|-----------------------------------|
| Results: Process contribution                                                                     |                                                                                                                                             |                                                              |      |           |                            |                              |                                                                                                                                             |                                                                  |                                   |
| Product: 1 Kg Microwave (S2) polyphenols (of project PEF with sensitivity analysis - electricity) |                                                                                                                                             |                                                              |      |           |                            |                              |                                                                                                                                             |                                                                  |                                   |
| Method: ReCiPe 2016 Endpoint (H) V1.03 / World (2010) H/A                                         |                                                                                                                                             |                                                              |      |           |                            |                              |                                                                                                                                             |                                                                  |                                   |
| Indicator: Single score                                                                           |                                                                                                                                             |                                                              |      |           |                            |                              |                                                                                                                                             |                                                                  |                                   |
| Cut-off: 0%                                                                                       |                                                                                                                                             |                                                              |      |           |                            |                              |                                                                                                                                             |                                                                  |                                   |
| Default units: No                                                                                 |                                                                                                                                             |                                                              |      |           |                            |                              |                                                                                                                                             |                                                                  |                                   |
| Exclude infrastructure: No                                                                        |                                                                                                                                             |                                                              |      |           |                            |                              |                                                                                                                                             |                                                                  |                                   |
| Exclude long-term emissions: No                                                                   |                                                                                                                                             |                                                              |      |           |                            |                              |                                                                                                                                             |                                                                  |                                   |
| Sorted on item: Total                                                                             |                                                                                                                                             |                                                              |      |           |                            |                              |                                                                                                                                             |                                                                  |                                   |
| Sort order: Descending                                                                            |                                                                                                                                             |                                                              |      |           |                            |                              |                                                                                                                                             |                                                                  |                                   |
| No                                                                                                | Process                                                                                                                                     | Project                                                      | Unit | Total     | Microwave (S2) polyphenols | Microwave (S2) extractor new | Electricity, low voltage (GR)   electricity production, photovoltaic, 3kWp slanted-roof installation, multi-Si, panel, mounted   Cut-off, S | Tap water (Europe without Switzerland)   market for   Cut-off, S | Moringa leaves 8% moisture (DMPM) |
|                                                                                                   | Total of all processes                                                                                                                      |                                                              | Pt   | 26.818446 | 0                          | 0.5527308                    | 1.2695751                                                                                                                                   | 0.0610576                                                        | 24.935083                         |
| 1                                                                                                 | Moringa leaves 8% moisture (DMPM)                                                                                                           | PEF with sensitivity analysis (electricity)                  | Pt   | 21.127833 | 0                          | 0                            | 0                                                                                                                                           | 0                                                                | 21.127833                         |
| 2                                                                                                 | Electricity, low voltage (GR)   electricity production, photovoltaic, 3kWp slanted-roof installation, multi-Si, panel, mounted   Cut-off, S | Ecoinvent 3 - allocation, cut-off by classification - system | Pt   | 2.931145  | 0                          | 0                            | 1.2695751                                                                                                                                   | 0                                                                | 1.6615699                         |
| 3                                                                                                 | Transport, freight, lorry 3.5–7.5 metric ton, euro5 (RER)   market for transport, freight, lorry 3.5–7.5 metric ton, EURO5   Cut-off, S     | Ecoinvent 3 - allocation, cut-off by classification - system | Pt   | 0.9576921 | 0                          | 0                            | 0                                                                                                                                           | 0                                                                | 0.9576921                         |
| 4                                                                                                 | Diesel (GLO)   market group for   Cut-off, S                                                                                                | Ecoinvent 3 - allocation, cut-off by classification - system | Pt   | 0.8299213 | 0                          | 0                            | 0                                                                                                                                           | 0                                                                | 0.8299213                         |
| 5                                                                                                 | Copper (GLO)   market for   Cut-off, S                                                                                                      | Ecoinvent 3 - allocation, cut-off by classification - system | Pt   | 0.2786908 | 0                          | 0.2786908                    | 0                                                                                                                                           | 0                                                                | 0                                 |
| 6                                                                                                 | Chromium steel pipe (GLO)   market for   Cut-off, S                                                                                         | Ecoinvent 3 - allocation, cut-off by classification - system | Pt   | 0.2620326 | 0                          | 0.2620326                    | 0                                                                                                                                           | 0                                                                | 0                                 |
| 7                                                                                                 | Polyvinylchloride, bulk polymerised (GLO)   market for   Cut-off, S                                                                         | Ecoinvent 3 - allocation, cut-off by classification - system | Pt   | 0.2000519 | 0                          | 0                            | 0                                                                                                                                           | 0                                                                | 0.2000519                         |
| 8                                                                                                 | Polypropylene, granulate (GLO)   market for   Cut-off, S                                                                                    | Ecoinvent 3 - allocation, cut-off by classification - system | Pt   | 0.155519  | 0                          | 0                            | 0                                                                                                                                           | 0                                                                | 0.155519                          |
| 9                                                                                                 | Tap water (Europe without Switzerland)   market for   Cut-off, S                                                                            | Ecoinvent 3 - allocation, cut-off by classification - system | Pt   | 0.0610576 | 0                          | 0                            | 0                                                                                                                                           | 0.0610576                                                        | 0                                 |
| 10                                                                                                | Acrylonitrile-butadiene-styrene copolymer (GLO)   market for   Cut-off, S                                                                   | Ecoinvent 3 - allocation, cut-off by classification - system | Pt   | 0.01154   | 0                          | 0.01154                      | 0                                                                                                                                           | 0                                                                | 0                                 |
| 11                                                                                                | Tap water (RoW)   market for   Cut-off, S                                                                                                   | Ecoinvent 3 - allocation, cut-off by classification - system | Pt   | 0.002496  | 0                          | 0                            | 0                                                                                                                                           | 0                                                                | 0.002496                          |
| 12                                                                                                | Glass tube, borosilicate (GLO)   market for   Cut-off, S                                                                                    | Ecoinvent 3 - allocation, cut-off by classification - system | Pt   | 0.0004673 | 0                          | 0.0004673                    | 0                                                                                                                                           | 0                                                                | 0                                 |
| 13                                                                                                | Microwave (S2) polyphenols                                                                                                                  | PEF with sensitivity analysis (electricity)                  | Pt   | 0         | 0                          | 0                            | 0                                                                                                                                           | 0                                                                | 0                                 |
| 14                                                                                                | Microwave (S2) extractor new                                                                                                                | PEF with sensitivity analysis (electricity)                  | Pt   | 0         | 0                          | 0                            | 0                                                                                                                                           | 0                                                                | 0                                 |

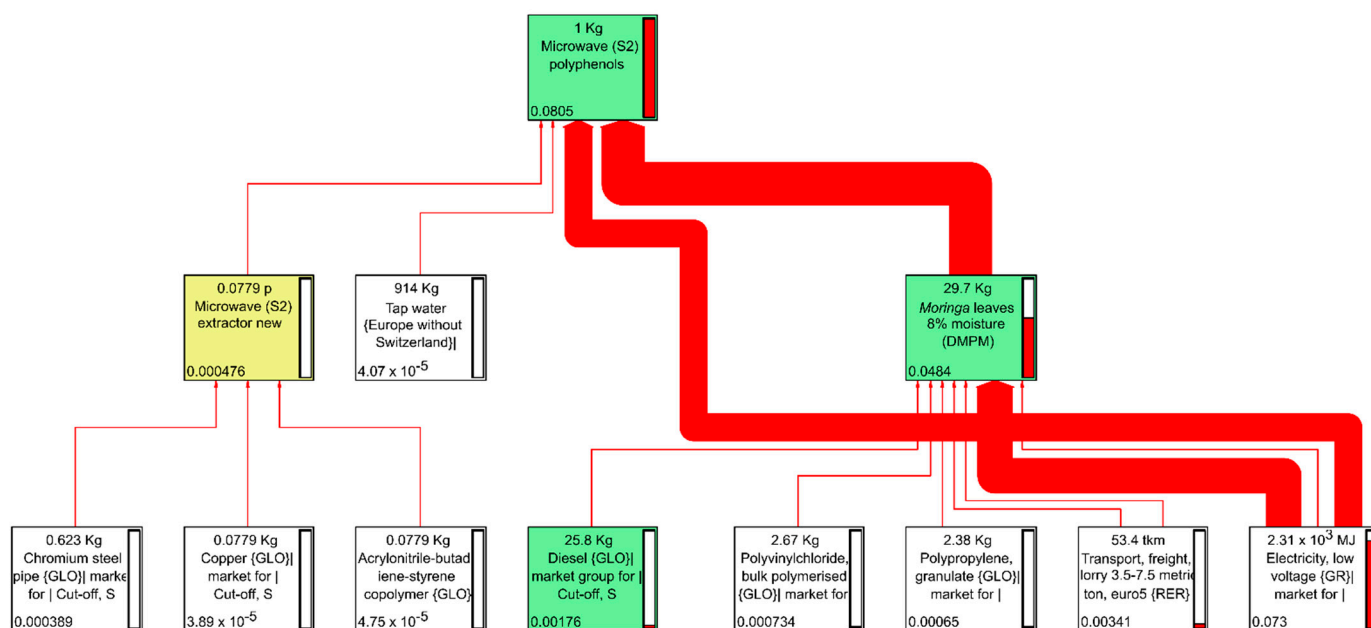

**Figure S1.** Data model for system S2 (MAE) from SimaPro (ecoinvent) Release 9.0.0.30, PRé Sustainability B.V. software.

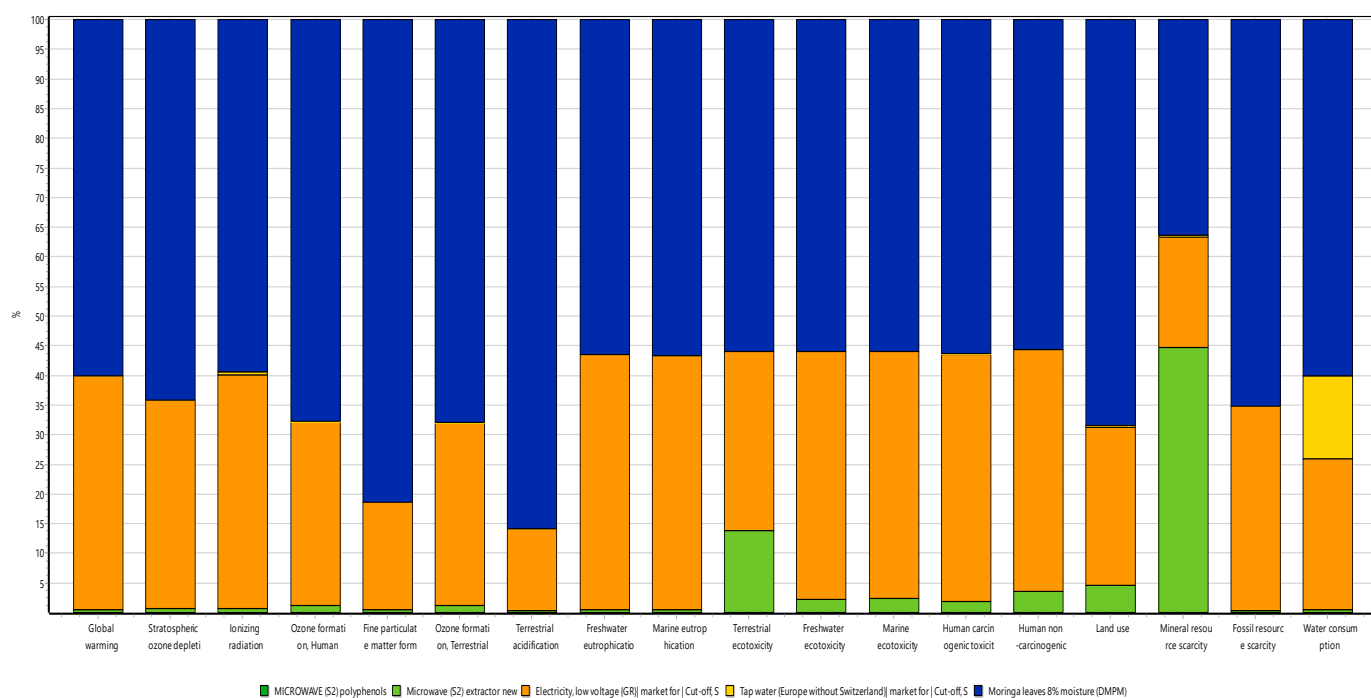

**Figure S2.** Environmental impact data of the FU manufacture for the system S2 (MAE).

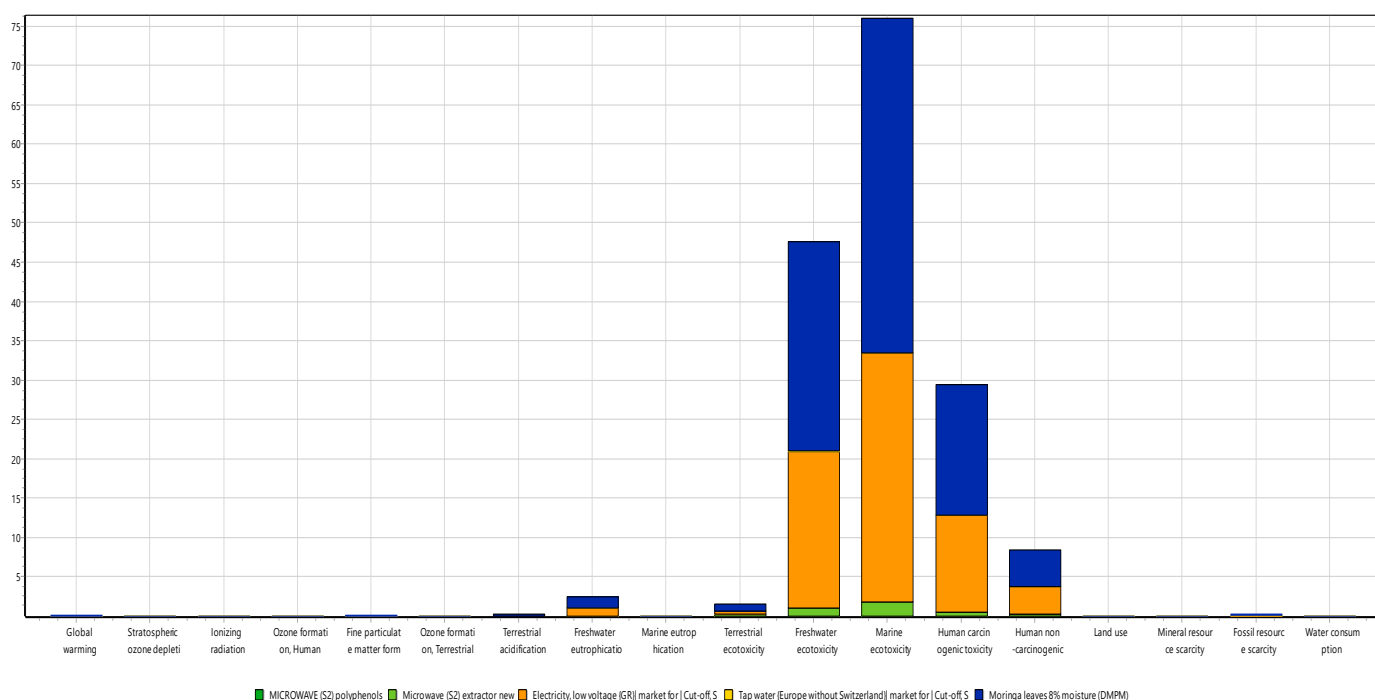

Figure S3. Normalized Environmental impact data of the FU manufacture for the system S2 (MAE).

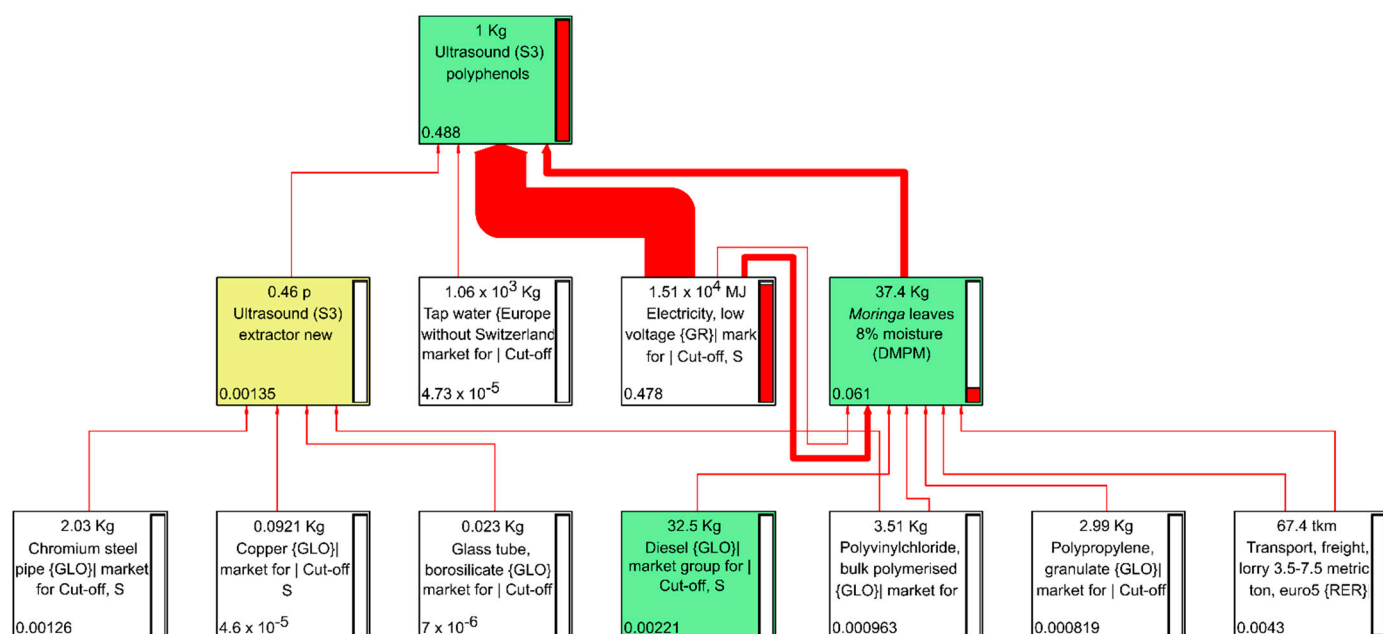

Figure S4. Data model for system S3 (UAE) from SimaPro (ecoinvent) Release 9.0.0.30, PRé Sustainability B.V. software.

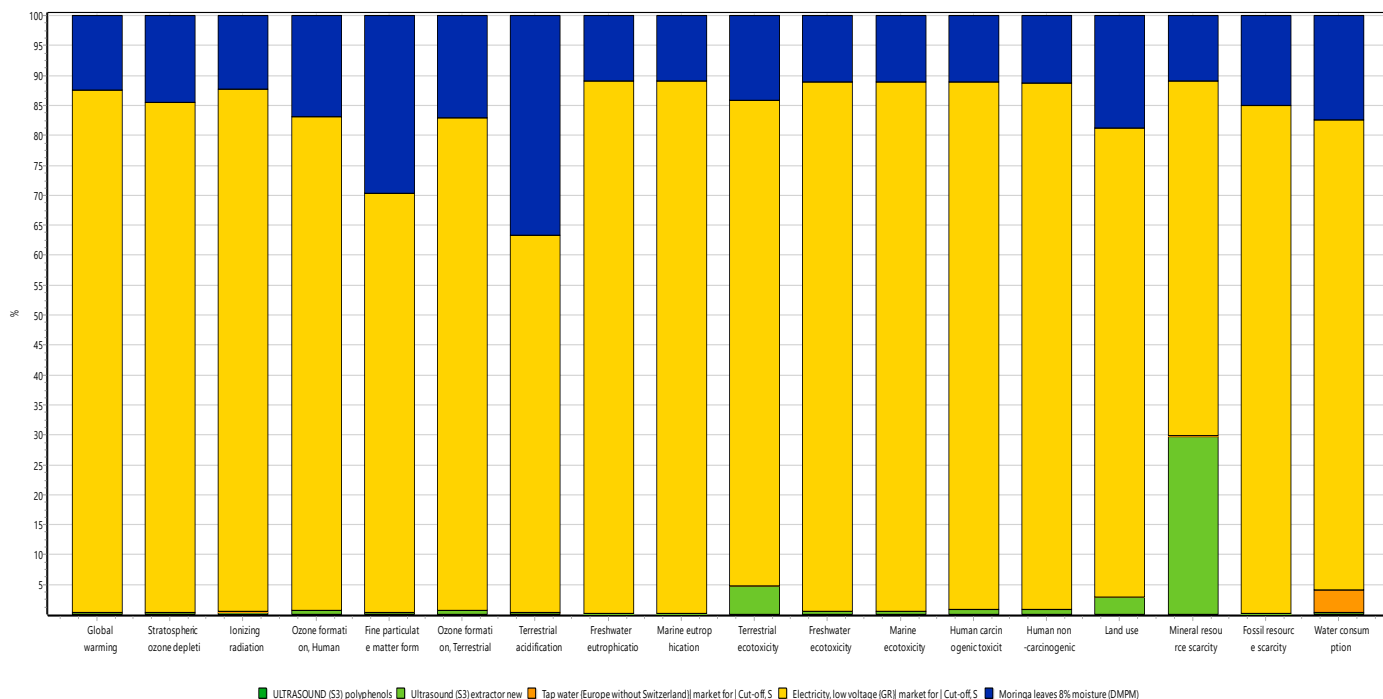

**Figure S5.** Environmental impact data of the FU manufacture for the system S3 (UAE).

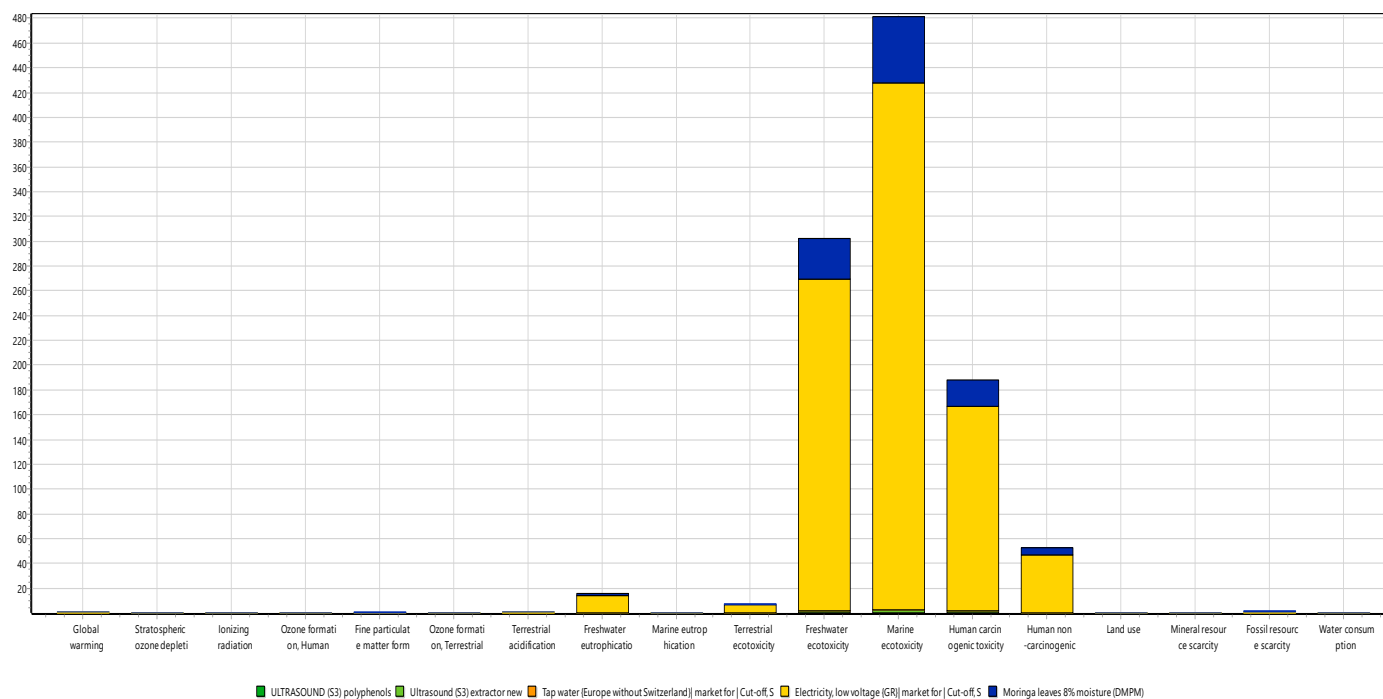

**Figure S6.** Normalized Environmental impact data of the FU manufacture for the system S3 (UAE).

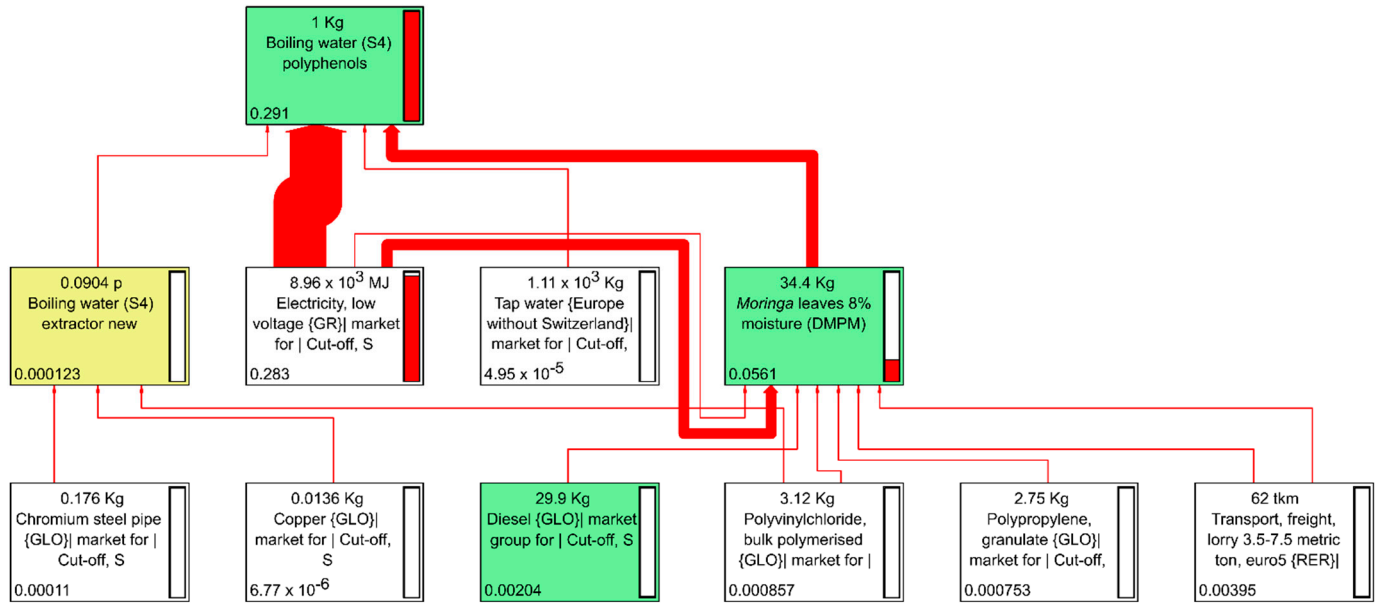

Figure S7. Data model for system S4 (BW) from SimaPro (ecoinvent) Release 9.0.0.30, PRé Sustainability B.V. software.

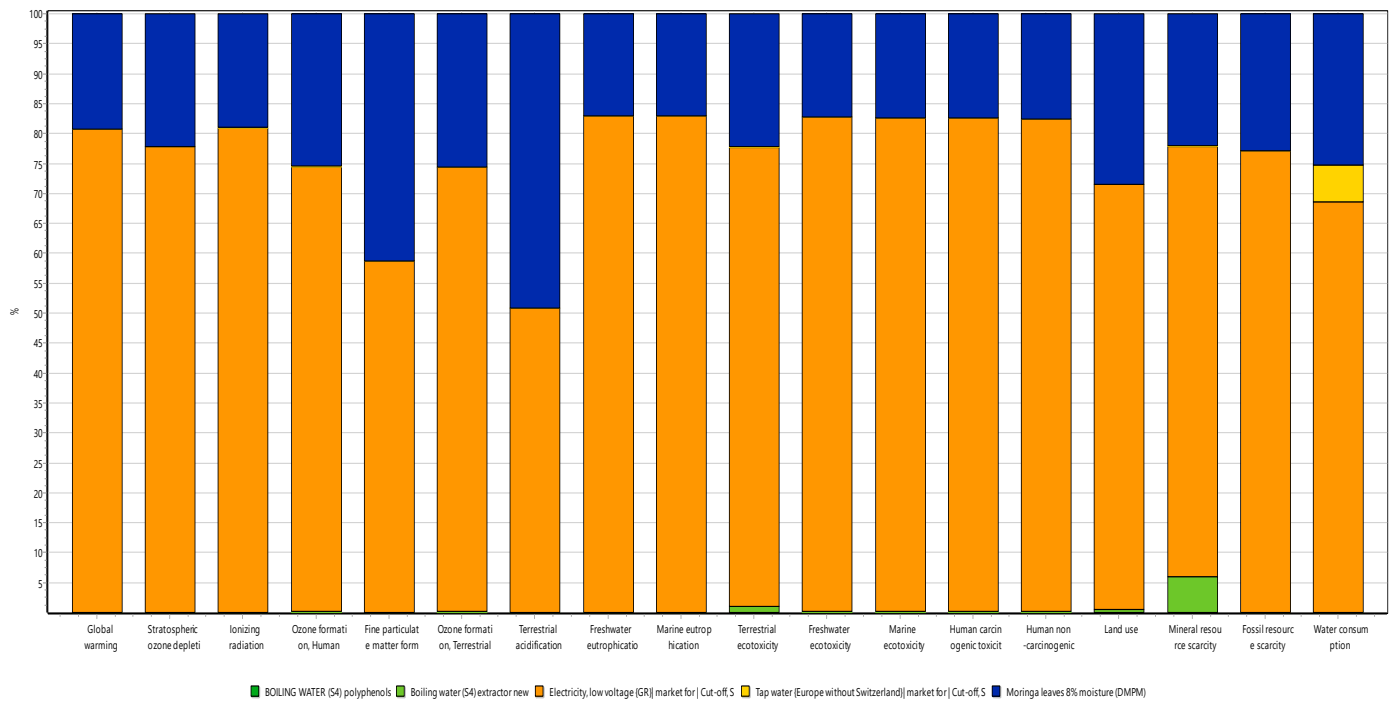

Figure S8. Environmental impact data of the FU manufacture for the system S4 (BW).

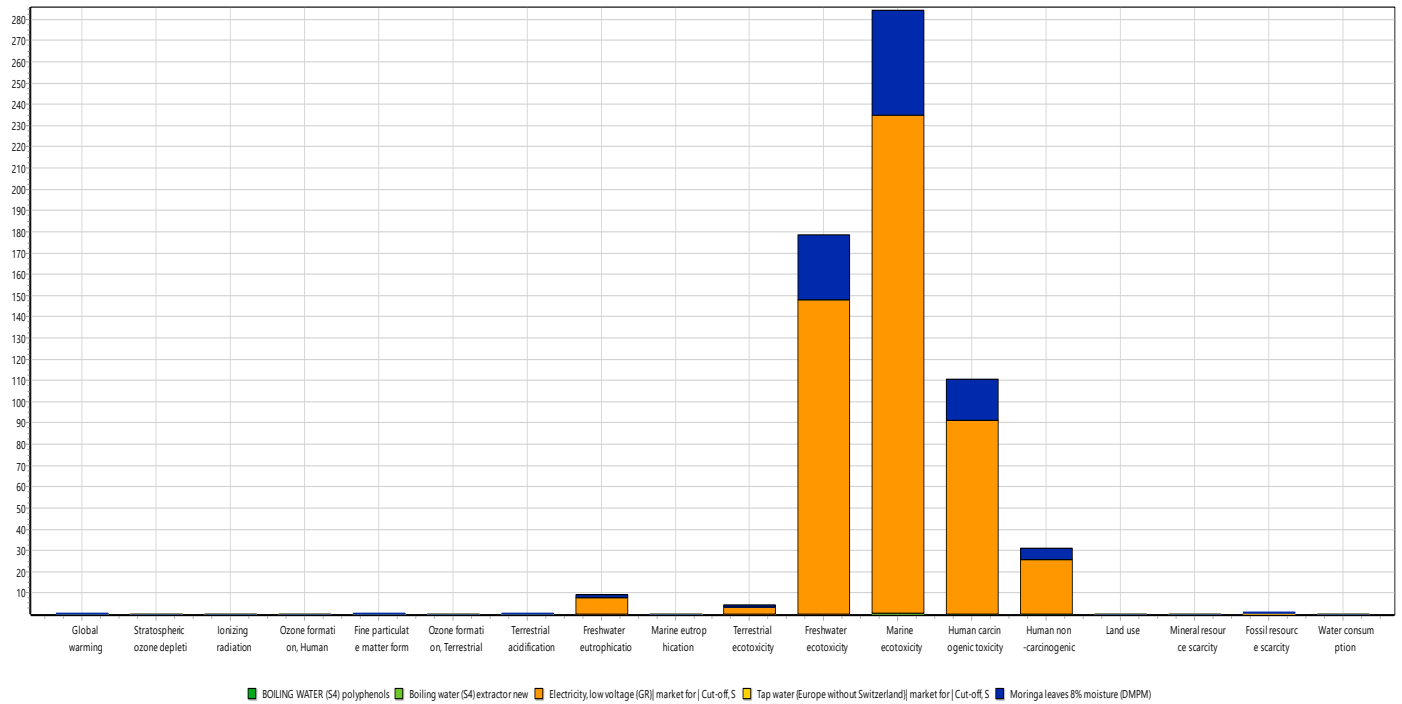

Figure S9. Normalized Environmental impact data of the FU manufacture for the system S4 (BW).

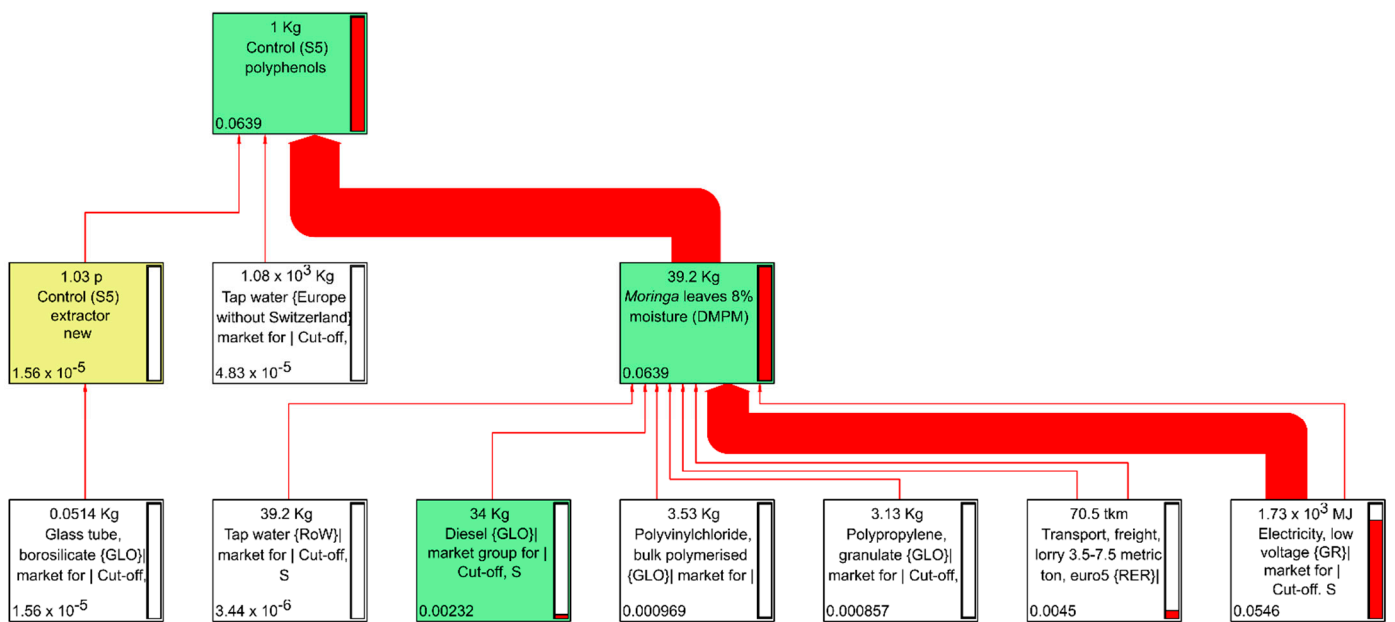

Figure S10. Data model for system S5 (C) from SimaPro (ecoinvent) Release 9.0.0.30, PRé Sustainability B.V. software.

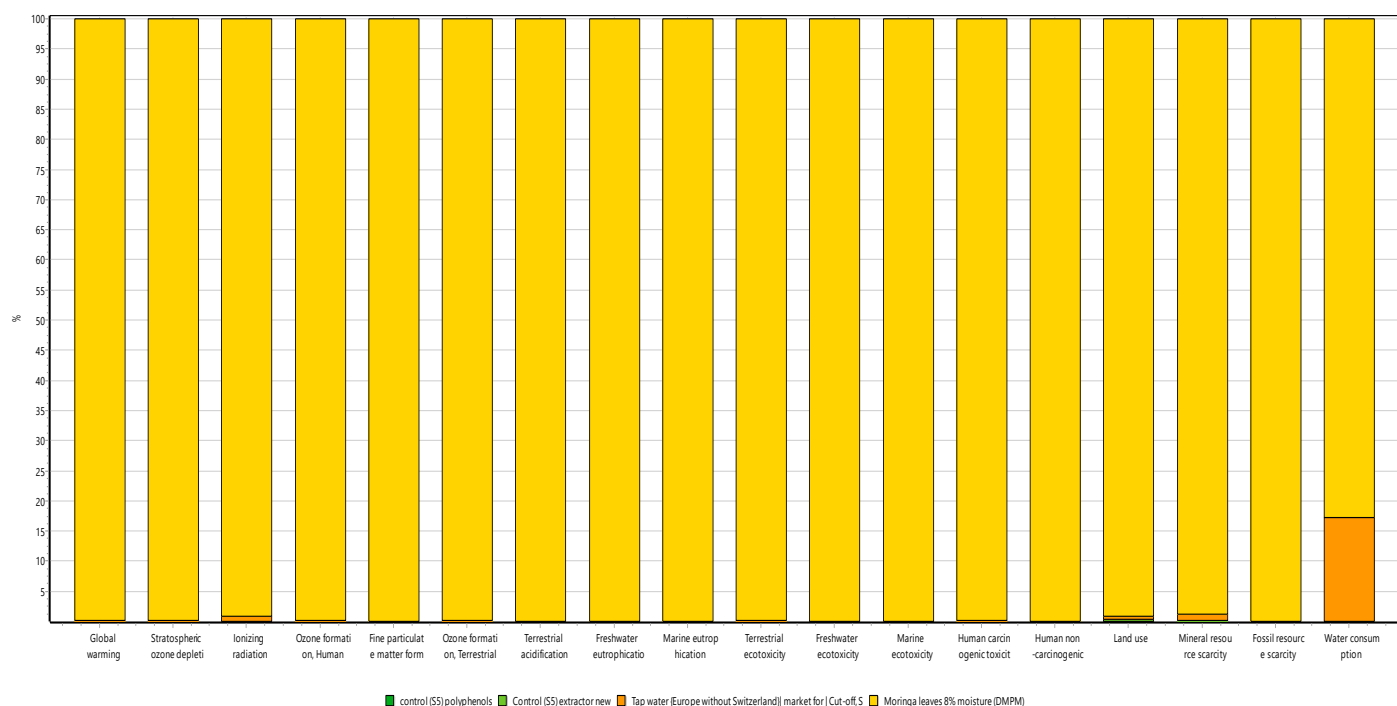

**Figure S11.** Environmental impact data of the FU manufacture for the system S5 (C).

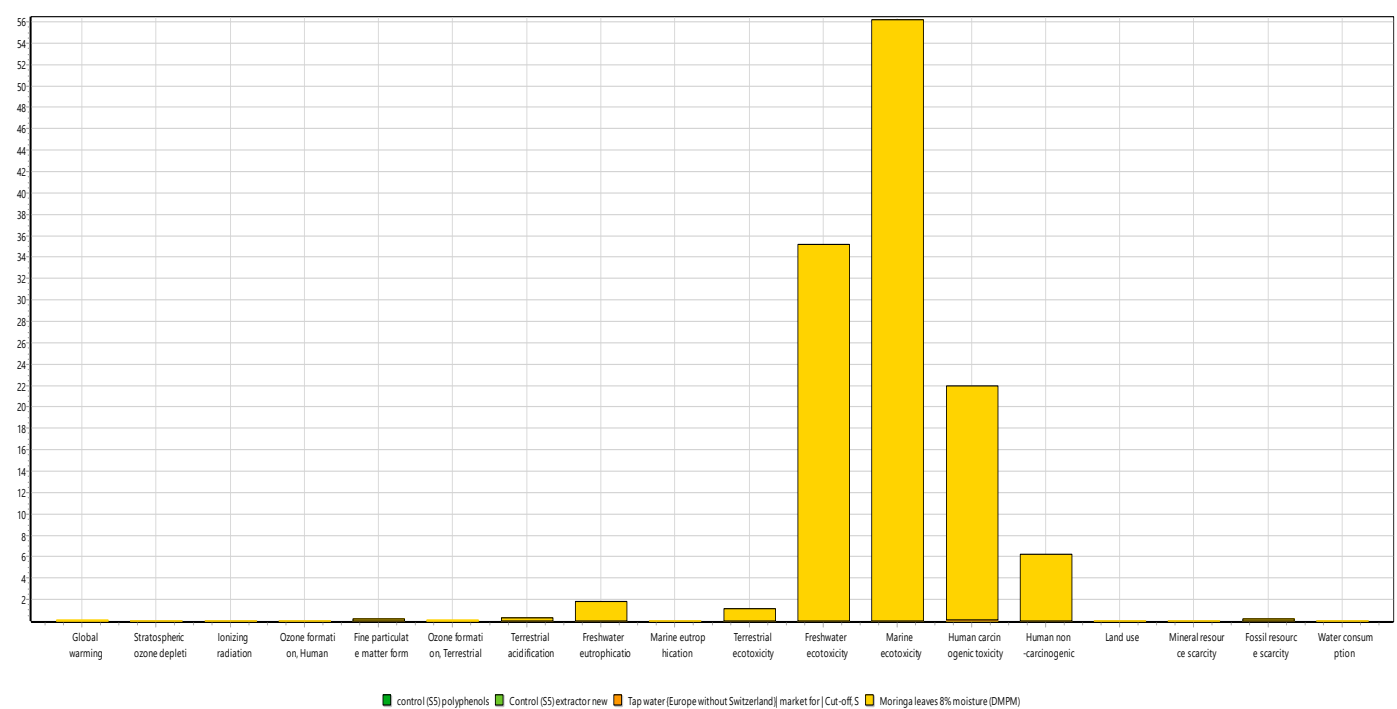

**Figure S12.** Normalized Environmental impact data of the FU manufacture for the system S5 (C).
