# Supplementary material for: Analysis of Five-Extraction Technologies’ Environmental Impact on the Polyphenols Production from Moringa oleifera Leaves Using the Life Cycle Assessment Tool Based on ISO 14040
Source: MDPI journal article supplement (doi:10.3390/su15032328), 2023-01-27
Supplement: s1 [file s1]

Archive with 1 entries (1 files):
- sustainability-2116949-supplementary.pdf
